# Supplementary material for: Rapid monocyte infiltration following retinal detachment is dependent on non-canonical IL6 signaling through gp130
Source: PubMed Central journal article supplement (PMC5481880; doi:10.1186/s12974-017-0886-6), 2017-06-23
Supplement: 12974_2017_886_MOESM2_ESM.pdf [file 12974_2017_886_MOESM2_ESM.pdf]

**Supplementary Table 2. Ocular Expression of the gp130 Receptor Cytokine Family in Normal and Detached Retina of Mouse and Human**

| Cytokines & Receptors                 | Normal Mouse/Human Eye                                                                                   |                                                                          |                                                                                                                                                                    | Mouse/Human RD/PVR                                    |                                                               |                                                                                                                                                                                                                                                                                                                                           | Roles in Neuroinflammation                                                                                                                                                                                                                  | Roles in gp130 Signaling Pathway                                                                                                                                                                                                                                                                                                           |
|---------------------------------------|----------------------------------------------------------------------------------------------------------|--------------------------------------------------------------------------|--------------------------------------------------------------------------------------------------------------------------------------------------------------------|-------------------------------------------------------|---------------------------------------------------------------|-------------------------------------------------------------------------------------------------------------------------------------------------------------------------------------------------------------------------------------------------------------------------------------------------------------------------------------------|---------------------------------------------------------------------------------------------------------------------------------------------------------------------------------------------------------------------------------------------|--------------------------------------------------------------------------------------------------------------------------------------------------------------------------------------------------------------------------------------------------------------------------------------------------------------------------------------------|
|                                       | mRNA                                                                                                     | IHC                                                                      | Western Blot/ ELISA/ Cytokine arrays                                                                                                                               | mRNA                                                  | IHC                                                           | Western Blot/ ELISA/ Cytokine arrays                                                                                                                                                                                                                                                                                                      |                                                                                                                                                                                                                                             |                                                                                                                                                                                                                                                                                                                                            |
| <b>CNTF</b>                           | mouse retina[34, 35]; relatively low in hRPE[36]                                                         | weakly expressed in mouse GFAP positive-astrocytes/ Müller cells[37]     | mouse retina[37]                                                                                                                                                   | N/A                                                   | N/A                                                           | N/A                                                                                                                                                                                                                                                                                                                                       | CNTF was not detected in retinal microglia or macrophages. lens injury-induced macrophages infiltration, activation of microglia and astrocytes/Müller cells were not reduced in CNTF KO mice[37]                                           | CNTF knock-out didn't affect retinal LIF expression via western blot after ONC[37]. CNTF KO doesn't affect mRNA expressions of CNTFR $\alpha$ , LIF, LIFR $\beta$ , gp130, nor interfere STAT3 phosphorylation and SOCS3 activation [38]. CNTF did not activate phosphorylation of STAT-3, ERK, nor p38 MAP kinase in brain microglia [39] |
| <b>CNTFR</b>                          | no expression in most mouse retinal cells [18]; mouse retina[34]                                         | intensely expressed in mouse GCL and NFL[40]; detected in OS and GCL[41] | undetectable in hRPE[36]                                                                                                                                           | N/A                                                   | N/A                                                           | N/A                                                                                                                                                                                                                                                                                                                                       | CNTF weakly stimulated microglia, whereas soluble CNTFR alpha strongly did [39]                                                                                                                                                             | CLC:CLF-1:CNTFR $\alpha$ complex on cell membranes signals through gp130/LIFR $\beta$ [42]                                                                                                                                                                                                                                                 |
| <b>Cardiotrophin-1</b>                | mouse retina[35]; hRPE[36]                                                                               | N/A                                                                      | N/A                                                                                                                                                                | N/A                                                   | N/A                                                           | N/A                                                                                                                                                                                                                                                                                                                                       | alleviate high-fat diet induced cognitive impairment[43]                                                                                                                                                                                    | increase STAT3 phosphorylation in hRPE[36]                                                                                                                                                                                                                                                                                                 |
| <b>gp130</b>                          | highly expressed in hRPE[36]                                                                             | mouse ONL*                                                               | hRPE[36], mouse retina*                                                                                                                                            | N/A                                                   | increased in mouse INL and vitreous CD11b positive-monocytes* | significantly increase in mouse vitreous, not in retina after RD*                                                                                                                                                                                                                                                                         | soluble gp130 exerts an anti-inflammatory effect by inhibiting the pro-inflammatory arm of IL-6 signaling in the aged brain [44]                                                                                                            | prevention of astrocyte apoptosis, restriction of demyelination, and T cell infiltration were dependent on the gp130-Src homology region 2 domain-containing phosphatase 2/Ras/ERK, but not on the gp130-STAT1/3 pathway[45]                                                                                                               |
| <b>IL6</b>                            | no expression in most mouse retinal cells [18]; undetectable in mouse retina and RPE [46]                | Low-undetectable in mouse retina[47-49]                                  | undetectable in mouse retina* and very low in human MIO-M1 by multiple arrays[25]; ~5pg/ml in mouse retina [50, 51] and <300pg/ml in mouse RPE cells [52] by ELISA | increased in the vitreous samples of PVR patients[10] | N/A                                                           | 12 folds increase in the aqueous humor of RD patients[53], 5-15 folds and 23 folds increase in the vitreous of RD and PVR patients[27,54]. 2.5 folds increase in subretinal fluid of PVR patients compared with RD patients[8] by ELISA; no increase in mouse retina after RD*, but increased in human PVR retina [25] by multiple arrays | IL6 serve as photoreceptor neuroprotectant [55]; combinations of IL-6 and soluble IL-6R effectively inhibited apoptosis of T cell [56]. microglia are important regulators of the IL-6 trans-signaling response in the aged brain [44]      | IL6 KO failed to affect mRNA of gp130, but reduced gp130 protein by 30% in mouse retina[57]                                                                                                                                                                                                                                                |
| <b>IL6R<math>\alpha</math></b>        | no expression in most mouse retinal cells [18]                                                           | weak localization to RGC soma and vasculature [58]                       | undetectable in mouse retina by multiple arrays*; very low in mouse retina measured by western blot[58]                                                            | N/A                                                   | N/A                                                           | membrane-bound IL6R $\alpha$ was undetectable in mouse retina and vitreous after RD by western blot*                                                                                                                                                                                                                                      | IL-6R mRNA and protein was present in mouse brain microglia[59]                                                                                                                                                                             | IL-6 trans-signaling is pro-inflammatory whereas classic IL-6 signaling via the membrane bound IL-6R is needed for regeneration or anti-inflammatory activities[60]                                                                                                                                                                        |
| <b>IL11</b>                           | no expression in most mouse retinal cells [18]; weak in human RPE[61]                                    | N/A                                                                      | N/A                                                                                                                                                                | N/A                                                   | N/A                                                           | no increase in human PVR retina[25] by multiple arrays; no change in subretinal fluid between RD and PVR patients by ELISA[8]                                                                                                                                                                                                             | IL-11 signaling may not play as significant a role as other gp130 cytokines in mouse model of spinal cord injury. [62]                                                                                                                      |                                                                                                                                                                                                                                                                                                                                            |
| <b>IL11R<math>\alpha</math></b>       | high expression in most mouse retinal cells [18]                                                         | N/A                                                                      | N/A                                                                                                                                                                | N/A                                                   | N/A                                                           | N/A                                                                                                                                                                                                                                                                                                                                       | brain microglia has lower IL-11R mRNA[59].                                                                                                                                                                                                  | IL-11 can signal via trans-signaling mechanism[63]                                                                                                                                                                                                                                                                                         |
| <b>IL27</b>                           | mouse retina[64]                                                                                         | F4/80 positive-microglia in mouse INL and GCL[64]                        | very low in human MIO-M1 by multiple arrays[25]                                                                                                                    | N/A                                                   | N/A                                                           | no increase in mouse retina after RD* and human PVR retina[25] by multiple arrays                                                                                                                                                                                                                                                         | inhibited Th17 development and expansion in experimental autoimmune uveitis[64]; local IL-27 can modulate infiltrating immune cells[65]                                                                                                     | Exogenous IL-27 increased STAT1 phosphorylation, and up-regulated mRNA of SOCS1[64]                                                                                                                                                                                                                                                        |
| <b>IL27R<math>\alpha</math>/WSX-1</b> | no expression in most mouse retinal cells [18]; weak in mouse[64]                                        | mouse OS[64]                                                             | N/A                                                                                                                                                                | N/A                                                   | N/A                                                           | N/A                                                                                                                                                                                                                                                                                                                                       |                                                                                                                                                                                                                                             |                                                                                                                                                                                                                                                                                                                                            |
| <b>LIF</b>                            | no expression in most mouse retinal cells [18]; weak in primary mouse Müller cells[66]; mouse retina[35] | weakly expressed in GFAP positive-mouse astrocytes/ Müller cells[37]     | weak in mouse retina[37]; <25pg/ml in primary mouse Müller cells by ELISA[66]                                                                                      | N/A                                                   | N/A                                                           | no increase in human PVR retina[25] by multiple arrays; no change in vitreous of RD and PVR patients by ELISA[67]                                                                                                                                                                                                                         | lens injury-induced macrophages infiltration and activation of microglia and astrocytes/Müller cells were not reduced in CNTF/LIF double KO mice[37]. brain microglia has lower LIFR mRNA[59]                                               | pSTAT3 increased after exogenous LIF treatment[68]. Light induced upregulation of Jak3 was absent in LIF KO mice[69]                                                                                                                                                                                                                       |
| <b>LIFR</b>                           | no expression in most mouse retinal cells [18]; relatively low in hRPE[36]                               | mainly on the apical membrane of hRPE[36]                                | positive in hRPE[36] by western blot                                                                                                                               | N/A                                                   | N/A                                                           | N/A                                                                                                                                                                                                                                                                                                                                       |                                                                                                                                                                                                                                             |                                                                                                                                                                                                                                                                                                                                            |
| <b>Oncostatin M (OSM)</b>             | no expression in most mouse retinal cells [18]; relatively low in hRPE[36]                               | undetectable in mouse retina, weakly expressed in RPE[70]                | N/A                                                                                                                                                                | N/A                                                   | N/A                                                           | N/A                                                                                                                                                                                                                                                                                                                                       | activation of JAK/STAT3 signaling by OSM results in neuronal excitotoxicity[71]                                                                                                                                                             | induces STAT3 and ERK1/2 phosphorylation in hRPE[36]                                                                                                                                                                                                                                                                                       |
| <b>OSMR</b>                           | no expression in most mouse retinal cells [18]; mouse retina[70]                                         | undetectable in mouse retina, weakly expressed in RPE[70]                | undetectable in mouse retina[70]; positive in hRPE[36] by western blot                                                                                             | increased in human RD[72]                             | localized increase in mouse INL and RPE[70]                   | N/A                                                                                                                                                                                                                                                                                                                                       | increased in the apical microvilli of the RPE and OS region after light damage[70]; present in brain astrocytes but was undetectable in brain microglia[59]; OSMR-KO mice show increased monocyte trafficking during acute inflammation[73] | activate the Jak/STAT, the MAP kinase as well as the PI3K/Akt pathways[74]                                                                                                                                                                                                                                                                 |

CLC: cardiotrophin-like cytokine  
CLF-1: cytokine-like factor-1  
GCL: ganglion cell layer  
hRPE: human fetal RPE

INL: inner nuclear layer  
KO: knock out  
MIO-M1: human Müller cell line  
N/A: no answer

NFL: nerve fiber layer  
ONC: optic nerve crush  
ONL: outer nuclear layer  
OS: outer segments of photoreceptor

\*shown in results of the current study
