# Supplementary material for: Rapid monocyte infiltration following retinal detachment is dependent on non-canonical IL6 signaling through gp130
Source: Springer Nature journal article supplement (doi:10.1186/s12974-017-0886-6), 2017-06-23
Supplement: MOESM1 [file 12467646]

Supplementary Table 1. Antibodies used in the current study

| Antibody             | Company                   | Name and Catalogue Numbers      | Source                                | Concentration ( $\mu\text{g}/\mu\text{l}$ )              | Epitope Mapping                                                                     | Applications in current study | Results                                                                                                                                                                                                                                    |
|----------------------|---------------------------|---------------------------------|---------------------------------------|----------------------------------------------------------|-------------------------------------------------------------------------------------|-------------------------------|--------------------------------------------------------------------------------------------------------------------------------------------------------------------------------------------------------------------------------------------|
| Anti-IL6R $\alpha$   | Santa Cruz                | M-20, sc-660                    | rabbit polyclonal IgG                 | 0.2                                                      | C-terminus of mouse IL6R $\alpha$                                                   | IF, WB                        | IL6R $\alpha$ is undetectable in retina                                                                                                                                                                                                    |
|                      |                           | D-8, sc-374259                  | mouse monoclonal IgG1                 | 0.2                                                      | amino acids 433-460 at the C-terminus of mouse IL6R $\alpha$                        |                               |                                                                                                                                                                                                                                            |
|                      | R&D Systems               | AF1830                          | goat polyclonal IgG                   | 0.362-1, original concentration of different lot numbers | amino acids 20-357 of mouse myeloma cell line NS0-derived recombinant IL6R $\alpha$ | IF, WB, Neutralization        | IL6R $\alpha$ is undetectable in retina; failed to prevent CD11b+ monocytes after RD by intravitreal injection                                                                                                                             |
|                      | LifeSpan BioSciences      | extracellular domain, LS-C70920 | rat monoclonal IgG1                   | 0.5                                                      | amino acids 20-357 of mouse myeloma cell line NS0-derived recombinant IL6R $\alpha$ | WB                            | IL6R $\alpha$ is undetectable in retina, but positive in lysates of liver                                                                                                                                                                  |
| Anti-gp130           | R&D Systems               | MAB4682                         | rat monoclonal IgG1                   | 0.362-1, original concentration of different lot numbers | amino acids 23-617 of mouse myeloma cell line NS0-derived recombinant gp130         | Neutralization                | Anti-gp130 treatment decreased retinal CCL2 level, number of CD11b+ monocytes, as well as inhibited Erk1/2 expression and stimulated STAT3 upregulation in aqueous humor/vitreous samples                                                  |
|                      | EMD Millipore             | 06-291                          | rabbit polyclonal IgG                 | 1                                                        | amino acids 713-918                                                                 | WB                            | gp130 protein is detected in retina and aqueous humor/vitreous with double bands                                                                                                                                                           |
|                      | Cell signaling Technology | 37325                           | rabbit polyclonal                     | 100 $\mu\text{l}$                                        | endogenous levels of total GP130 protein independent of phosphorylation             | WB                            |                                                                                                                                                                                                                                            |
|                      | Santa Cruz                | M-20, sc-656                    | rabbit polyclonal IgG                 | 0.2                                                      | C-terminus of mouse gp130 origin                                                    | WB, IF                        | double bands observed on western blot; in immunofluorescence staining, gp130 expression was initially confined to outer nuclear layer of normal retina, and extended into the inner nuclear layer and monocytes in vitreous humor after RD |
| IgG1 isotype control | R&D Systems               | MAB002                          | monoclonal mouse IgG1 isotype control | 1                                                        | N/A                                                                                 | Flow cytometry, IF            | IgG1 isotype control showed more CD11b+ monocytes recruited into retina compared with gp130 blocking one day after RD.                                                                                                                     |

IF: Immunofluorescence

RD: retinal detachment

WB: western blot
